# Supplementary material
Source: PubMed Central journal article supplement (PMC4278237)

# Figure S1

## Collagen-I

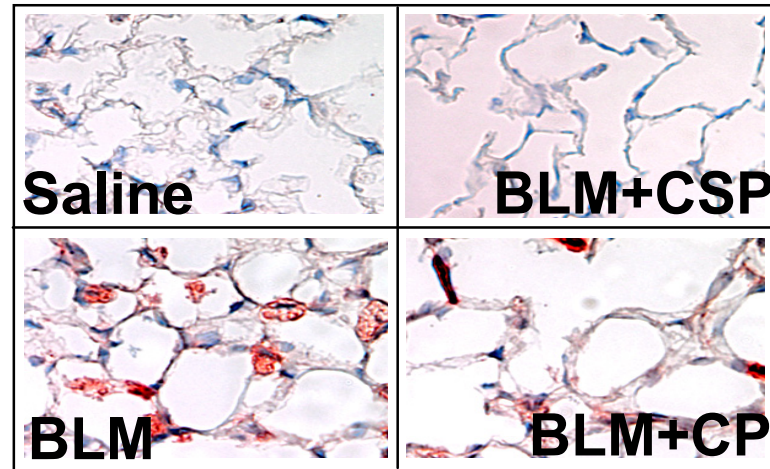

## ZO-1

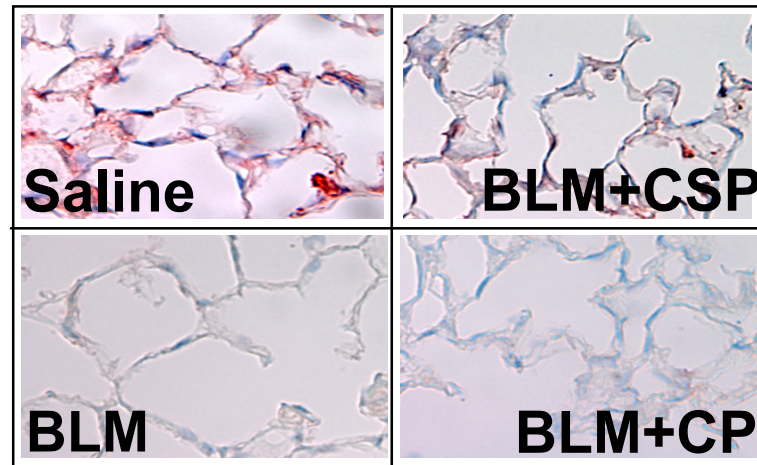

Supplement: mmc1.pdf [file mmc1.pdf]

# Figure S2

## Collagen-I

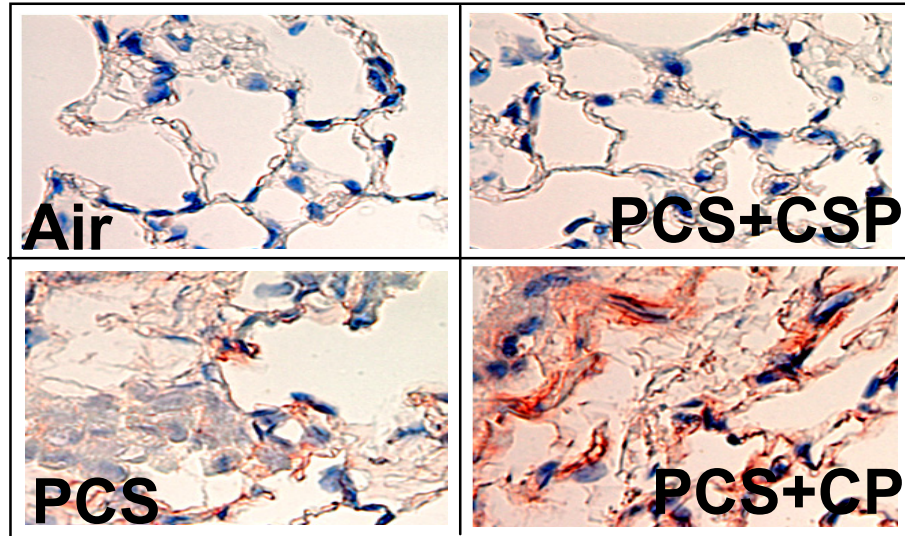

## ZO-1

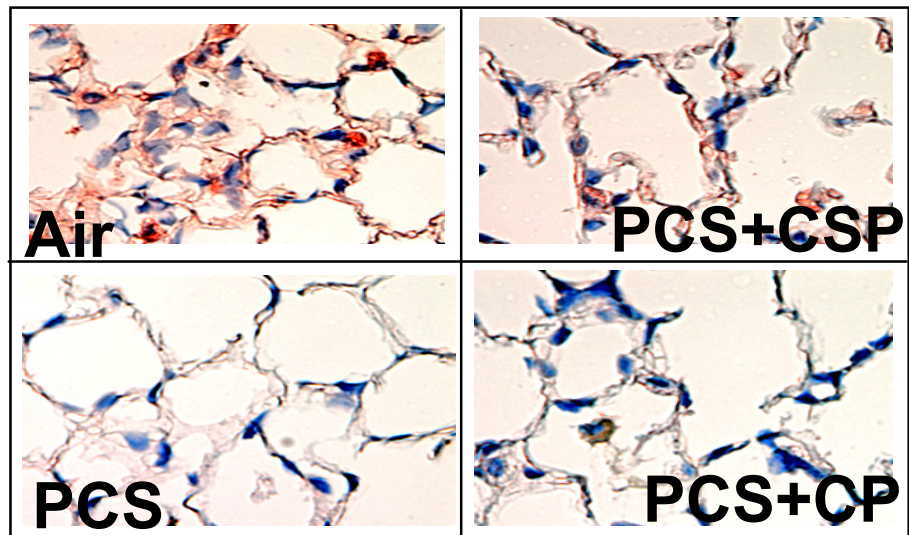

Supplement: mmc2.pdf [file mmc2.pdf]

# Figure-S3

A  $uPA^{-/-}$  ATII cells

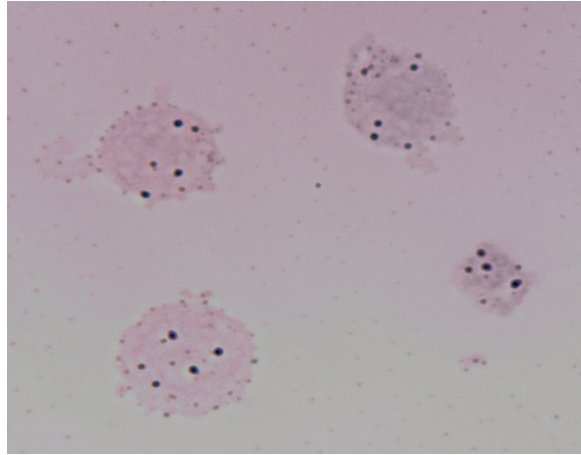

B  $uPAR^{-/-}$  ATII cells

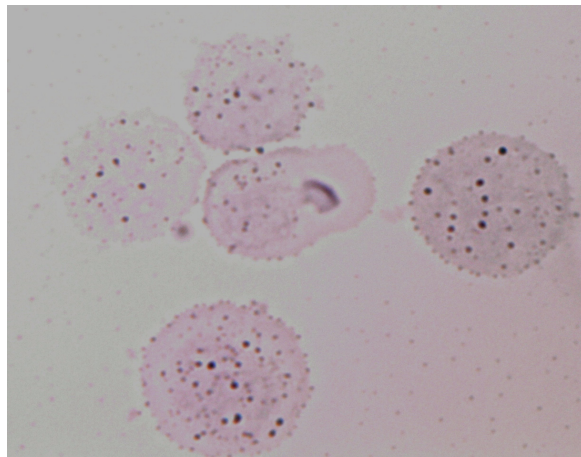

Supplement: mmc3.pdf [file mmc3.pdf]

# Figure S4

## ZO-1

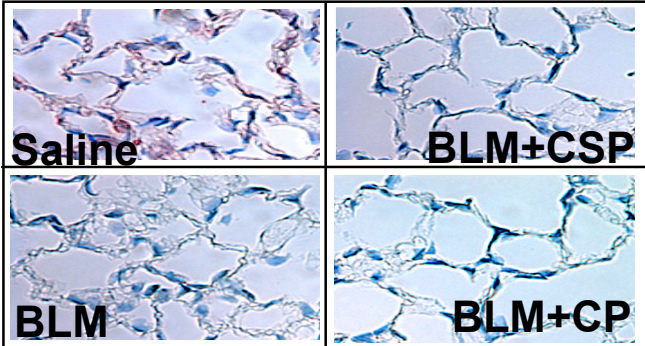

## Collagen- I

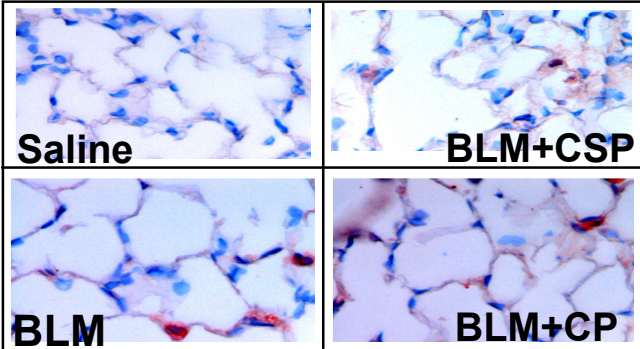

## $\alpha$ -SMA

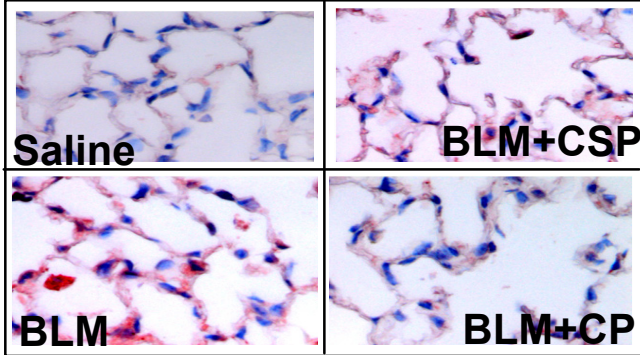

Supplement: mmc4.pdf [file mmc4.pdf]

Figure-S5

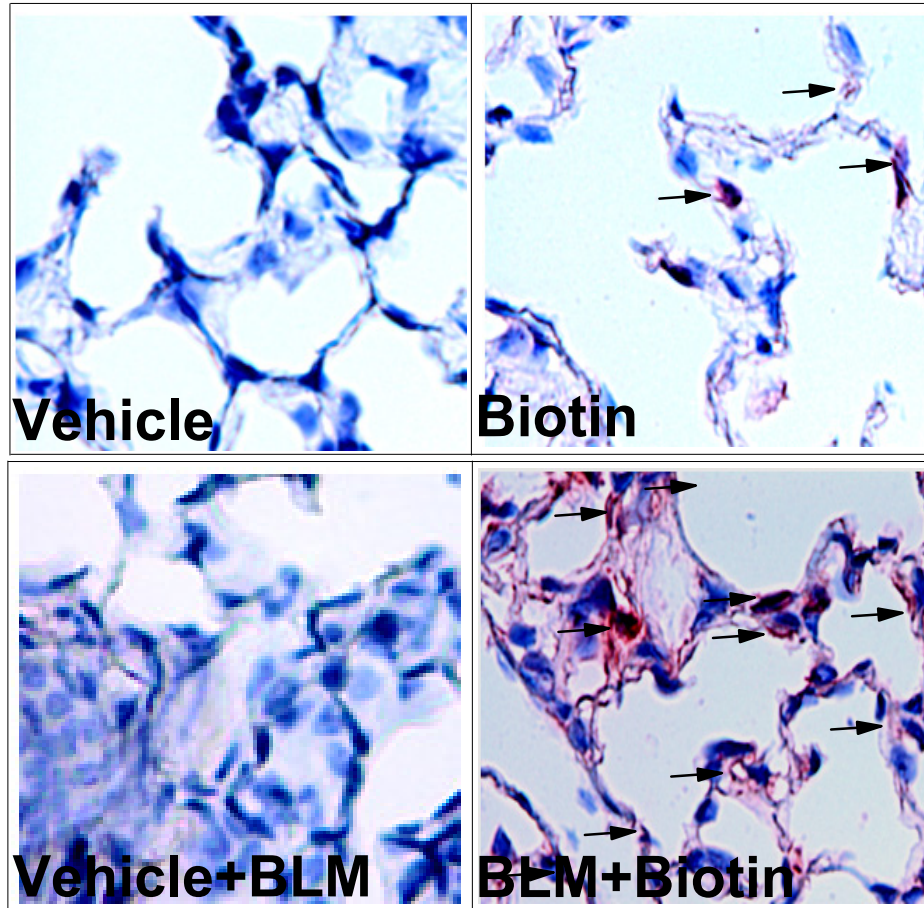

Supplement: mmc5.pdf [file mmc5.pdf]
